# Supplementary material for: Ultra-high energy density supercapacitors using a nickel phosphide/nickel/titanium carbide nanocomposite capacitor electrode
Source: Royal Society of Chemistry journal article supplement (doi:10.1039/d0nr01984d), 2020-01-01
Supplement: d0nr01984d1.pdf [file d0nr01984d1.pdf]

## Supporting Information

### **Ultrahigh Energy Density Supercapacitors Using Nickel Phosphide/Nickel/Titanium Carbide Nanocomposite Capacitor Electrodes**

Jing Xu,<sup>a</sup> Nianjun Yang,<sup>a\*</sup> Siyu Yu,<sup>a,b</sup> Anna Schulte,<sup>c</sup> Holger Schönherr,<sup>c</sup> Xin Jiang<sup>a\*</sup>

<sup>a</sup> Institute of Materials Engineering, University of Siegen, 57076 Siegen, Germany

<sup>b</sup> School of Chemistry and Chemical Engineering, Southwest University, Chongqing 400715, China

<sup>c</sup> Physical Chemistry I & Research Center of Micro and Nanochemistry and Engineering (Cμ), Department of Chemistry and Biology, University of Siegen, 57076 Siegen, Germany

E-mail: nianjun.yang@uni-siegen.de, xin.jiang@uni-siegen.de

## Supporting Figures

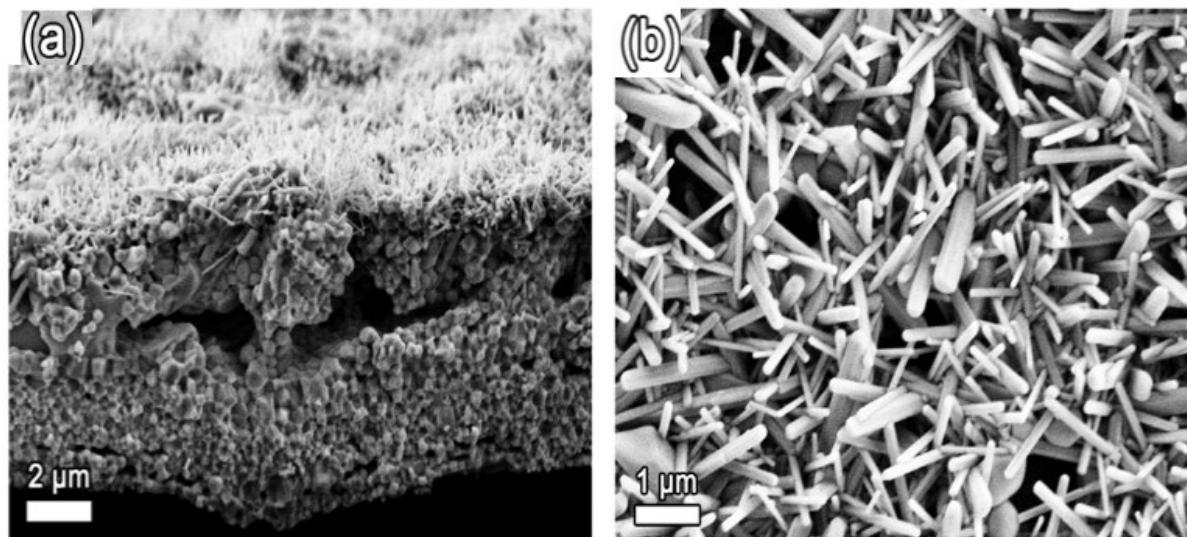

**Figure S1.** SEM images of a  $\text{Ni}_5\text{TiO}_7/\text{TiO}_2(\text{P})$  composite film in a (a) side and (b) top view.

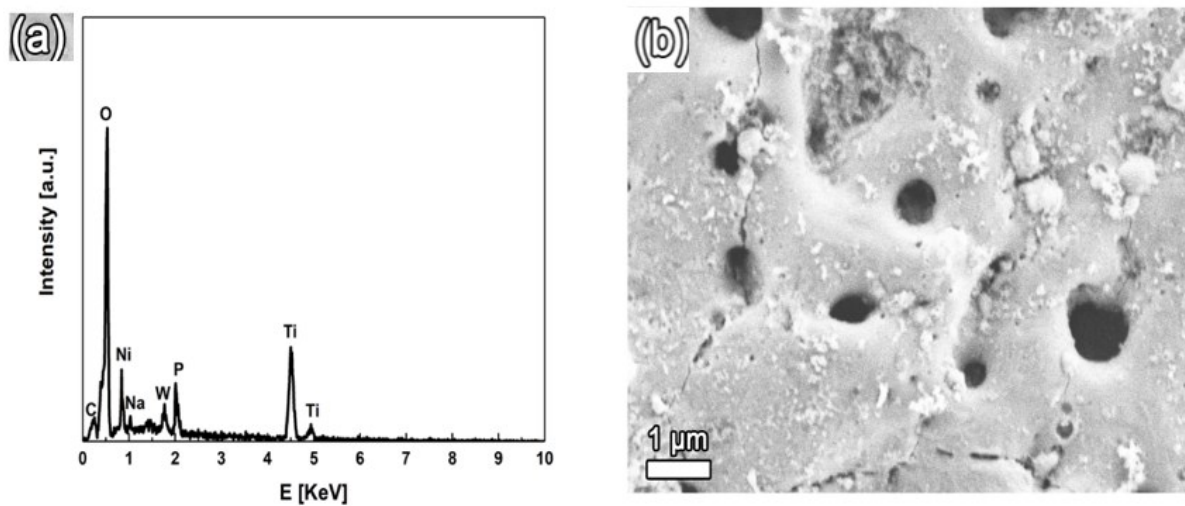

**Figure S2.** EDX line profile (a) and related SEM image (b) of a titanium substrate after a PEO process.

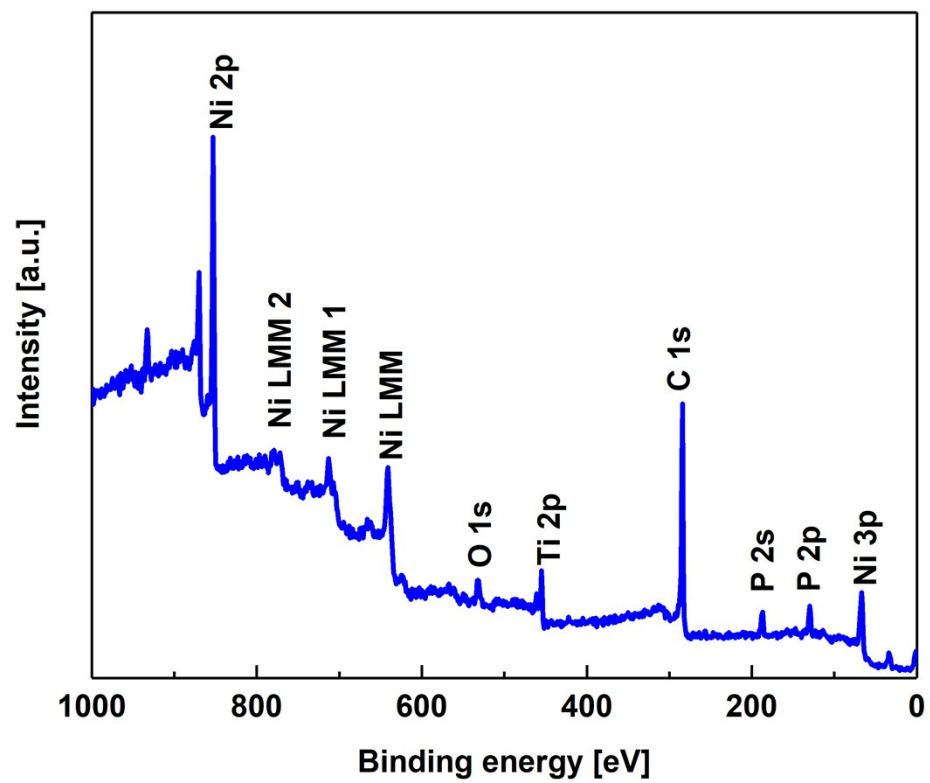

**Figure S3.** XPS survey spectrum of a Ni<sub>12</sub>P<sub>5</sub>/Ni/TiC composite film.

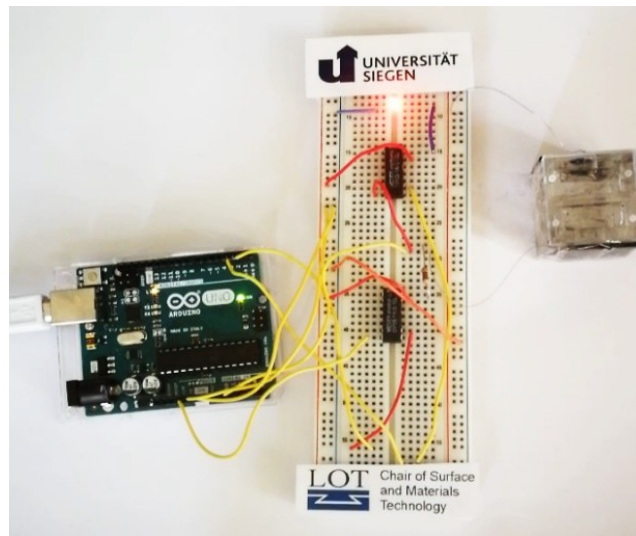

**Figure S4.** Photograph of a supercapacitor demonstrator operated by a single PC device.
